# Supplementary material for: New Solid Forms of Nitrofurantoin and 4-Aminopyridine Salt: Influence of Salt Hydration Level on Crystal Packing and Physicochemical Properties
Source: MDPI journal article supplement (doi:10.3390/molecules27248990), 2022-12-16
Supplement: s1 [file s1]

Supporting Materials

for

# New Solid Forms of Nitrofurantoin and 4-aminopyridine Salt: Influence of Salt Hydration Level on Crystal Packing and Physicochemical Properties

*Boycov D.E.,<sup>1</sup> Drozd K.V.,<sup>1</sup> Manin A.N.,<sup>1</sup> Churakov A.V.,<sup>2</sup> Perlovich G.L.<sup>1\*</sup>*

<sup>1</sup>G.A. Krestov Institute of Solution Chemistry of the Russian Academy of Sciences, 1

Akademicheskaya St., Ivanovo, 153045, Russian Federation

<sup>2</sup>Institute of General and Inorganic Chemistry, Russian Academy of Sciences, 31 Leninsky

Prosp., Moscow, 119991, Russian Federation

\* Corresponding author: [glp@isc-ras.ru](mailto:glp@isc-ras.ru)

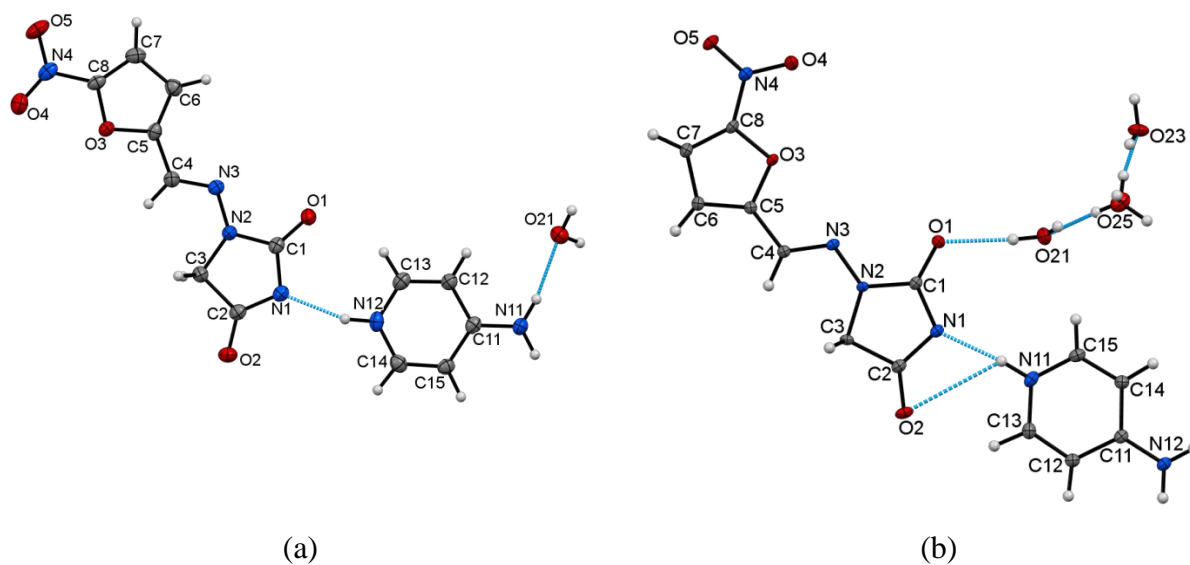

Figure S1. The ORTEP diagram of (a) [NFT+4AmPy+H<sub>2</sub>O] salt (1:1:1) and (b) [NFT+4AmPy+H<sub>2</sub>O] salt (1:1:4). Thermal ellipsoids are drawn at the 50% probability level. Intermolecular interactions are drawn as blue dashed lines.

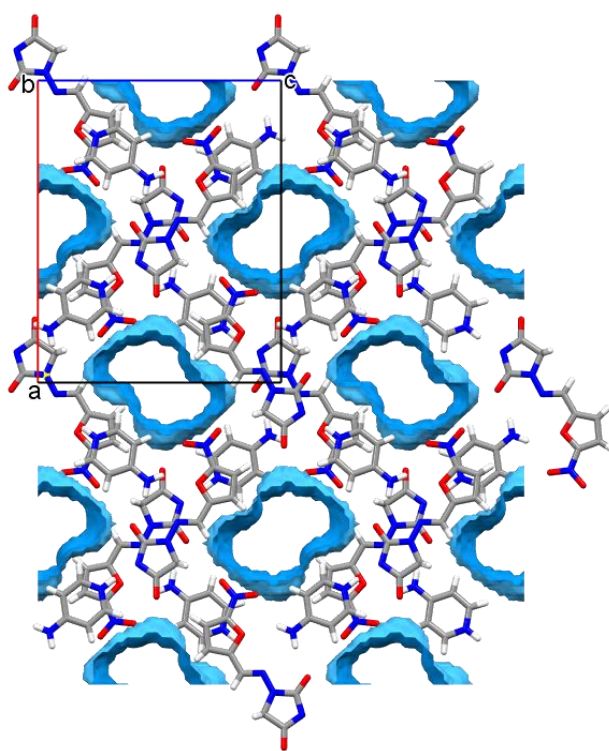

Figure S2. Water interaction map for the [NFT+4AmPy+H<sub>2</sub>O] salt (1:1:4).

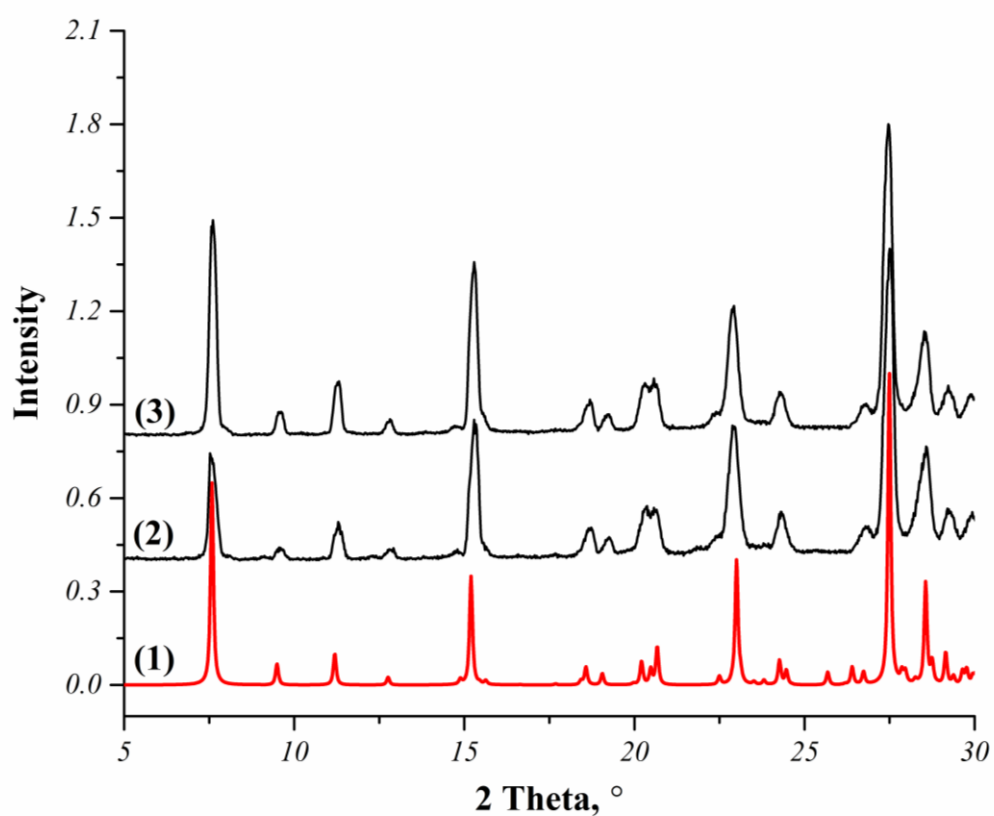

Figure S3. Comparison of the simulated PXRD calculated for the [NFT+4AmPy+H<sub>2</sub>O] salt (1:1:4) (1) with the experimental PXRD patterns of the powder samples obtained by LAG of the [NFT+4AmPy] salt (1:1) (2) and the [NFT+4AmPy+H<sub>2</sub>O] salt (1:1:1) (3) in the presence of water.

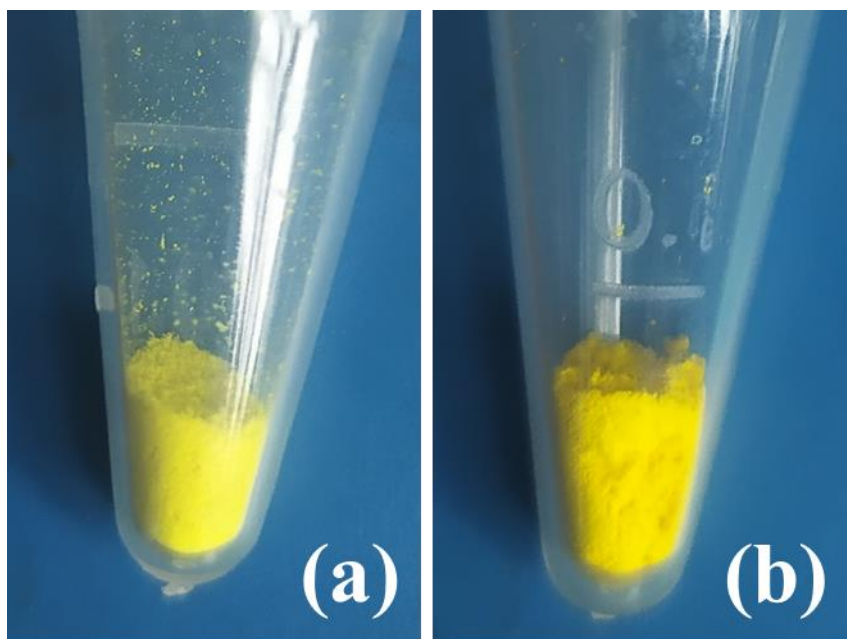

Figure S4. Color difference between (a) [NFT+4AmPy+H<sub>2</sub>O] salt (1:1:1) and (b) [NFT+4AmPy+H<sub>2</sub>O] salt (1:1:4) prepared by LAG method.

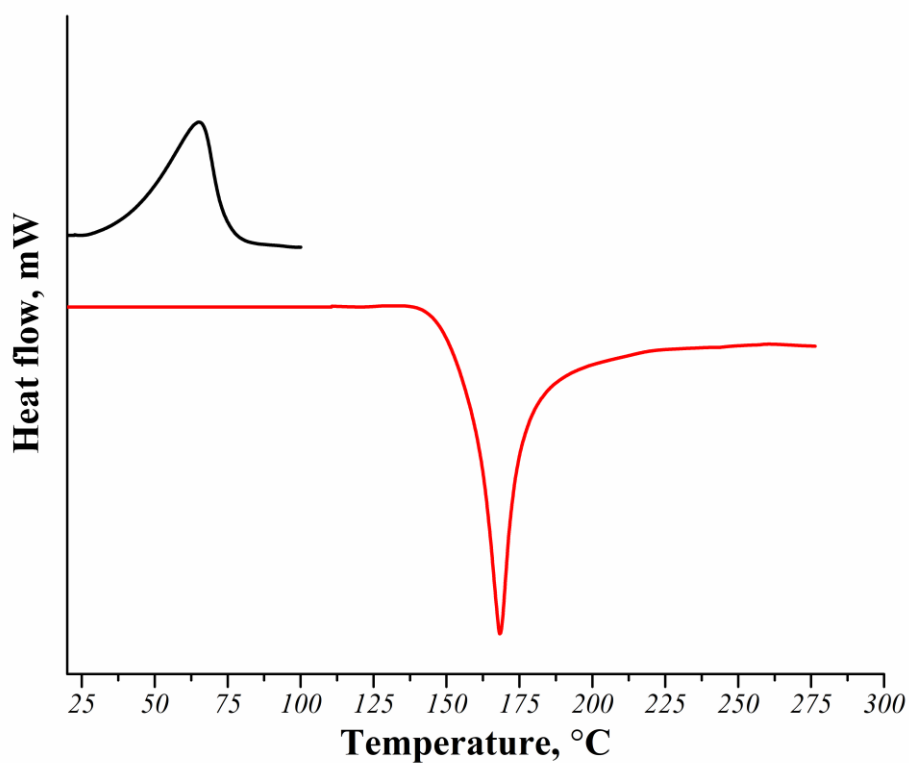

(a)

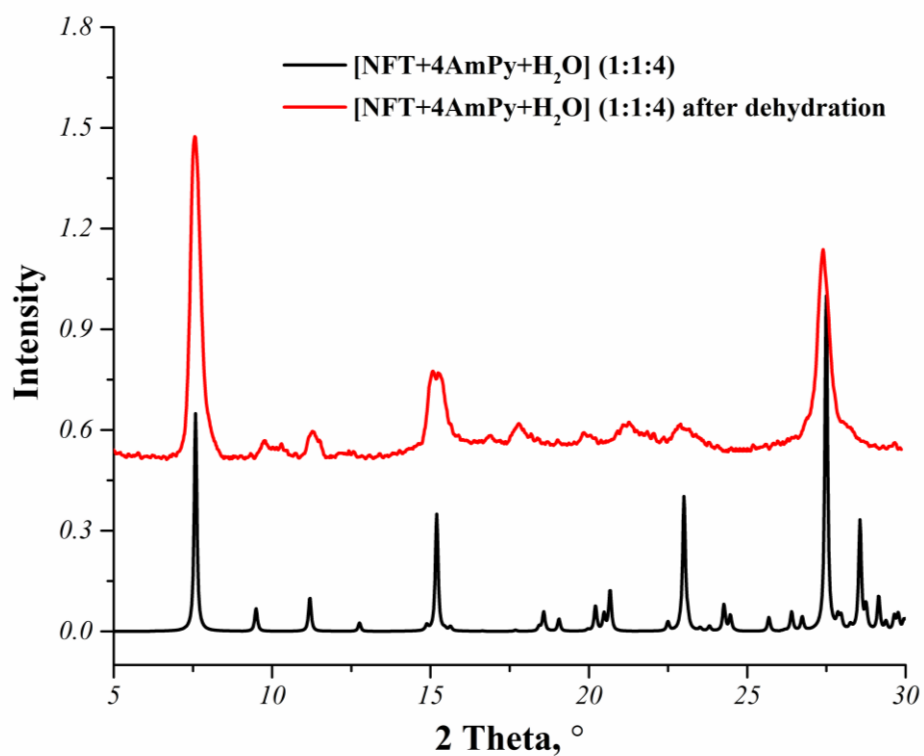

(b)

Figure S5. (a) DSC curves of the [NFT+4AmPy+H<sub>2</sub>O] salt (1:1:4): the black line shows the first heating, the red one – the second heating; (b) comparison of the experimental PXRD pattern of [NFT+4AmPy+H<sub>2</sub>O] salt (1:1:4) after dehydration and the simulated PXRD pattern calculated from the SCXRD data.

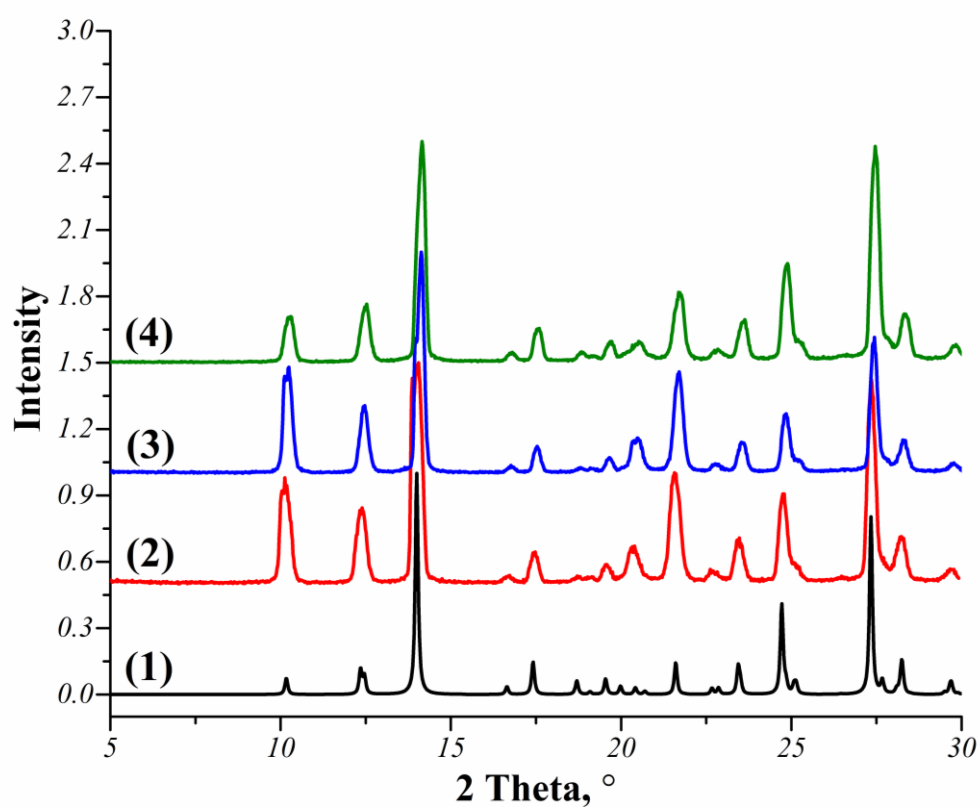

Figure S6. Results of PXRD analysis of the residual materials collected at the end of the dissolution experiments: (1) calculated PXRD patterns of NFT monohydrate; (2) [NFT+4AmPy] (1:1); (3) [NFT+4AmPy+H<sub>2</sub>O] (1:1:1) and (4) [NFT+4AmPy+H<sub>2</sub>O] (1:1:4).

Table S1. Hydrogen bond geometries for the NFT hydrated salts

| $D-H\cdots A$                                                                                                     | $D-H, \text{\AA}$ | $H\cdots A, \text{\AA}$ | $D\cdots A, \text{\AA}$ | $D-H\cdots A, ^\circ$ |
|-------------------------------------------------------------------------------------------------------------------|-------------------|-------------------------|-------------------------|-----------------------|
| <b>[NFT+4AmPy+H<sub>2</sub>O] salt (1:1:1)</b>                                                                    |                   |                         |                         |                       |
| N12 <sup>+</sup> —H1 <sup>+</sup> ...N1 <sup>-</sup>                                                              | 0.904 (19)        | 1.963 (19)              | 2.8396 (17)             | 162.9 (16)            |
| N11—H10...O21                                                                                                     | 0.91 (2)          | 2.03 (2)                | 2.9241 (18)             | 167.7 (17)            |
| N11—H11...O1 <sup>i</sup>                                                                                         | 0.905 (19)        | 2.030 (19)              | 2.8973 (17)             | 160.2 (16)            |
| O21—H20...O2 <sup>ii</sup>                                                                                        | 0.90 (2)          | 1.88 (2)                | 2.7669 (16)             | 169 (2)               |
| O21—H21...O2 <sup>iii</sup>                                                                                       | 0.87 (2)          | 1.97 (2)                | 2.8286 (17)             | 169 (2)               |
| Symmetry codes: (i) $x+1/2, -y+1/2, z-1/2$ ; (ii) $x+1/2, -y+1/2, z+1/2$ ; (iii) $-x+3/2, y-1/2, -z+1/2$          |                   |                         |                         |                       |
| <b>[NFT+4AmPy+H<sub>2</sub>O] salt (1:1:4)</b>                                                                    |                   |                         |                         |                       |
| N11 <sup>+</sup> —H1 <sup>+</sup> ...N1 <sup>-</sup>                                                              | 0.91 (3)          | 1.86 (3)                | 2.7669 (18)             | 174 (3)               |
| O21—H21...O1                                                                                                      | 0.82 (3)          | 1.94 (3)                | 2.7645 (18)             | 176 (3)               |
| O21—H22...O25                                                                                                     | 0.75 (4)          | 2.08 (4)                | 2.7837 (15)             | 156 (4)               |
| O23—H24...O2 <sup>i</sup>                                                                                         | 0.82 (4)          | 1.93 (4)                | 2.7523 (18)             | 178 (3)               |
| O23—H23...O25                                                                                                     | 0.81 (4)          | 1.99 (4)                | 2.7496 (15)             | 156 (4)               |
| O25—H28...O21                                                                                                     | 0.78 (4)          | 2.02 (4)                | 2.7837 (15)             | 166 (3)               |
| O25—H25...O23                                                                                                     | 0.81 (4)          | 1.99 (4)                | 2.7496 (15)             | 158 (3)               |
| O25—H26...O25 <sup>ii</sup>                                                                                       | 0.86 (3)          | 1.94 (3)                | 2.793 (2)               | 172 (3)               |
| O25—H27...O25 <sup>iii</sup>                                                                                      | 0.84 (4)          | 1.95 (4)                | 2.754 (2)               | 160 (4)               |
| N12—H10...O3 <sup>iv</sup>                                                                                        | 0.87 (2)          | 2.36 (2)                | 3.1269 (17)             | 148 (2)               |
| N12—H11...O1 <sup>iv</sup>                                                                                        | 0.89 (2)          | 2.09 (3)                | 2.9628 (18)             | 168 (2)               |
| Symmetry codes: (i) $x+1/2, y, -z+3/2$ ; (ii) $-x+1, -y+2, -z+2$ ; (iii) $x, -y+5/2, z$ ; (iv) $x-1/2, y, -z+3/2$ |                   |                         |                         |                       |
